# Supplementary material
Source: PubMed Central journal article supplement (PMC3760975)
Supplement: NIHMS475389-supplement-01.pdf [file NIHMS475389-supplement-01.pdf]

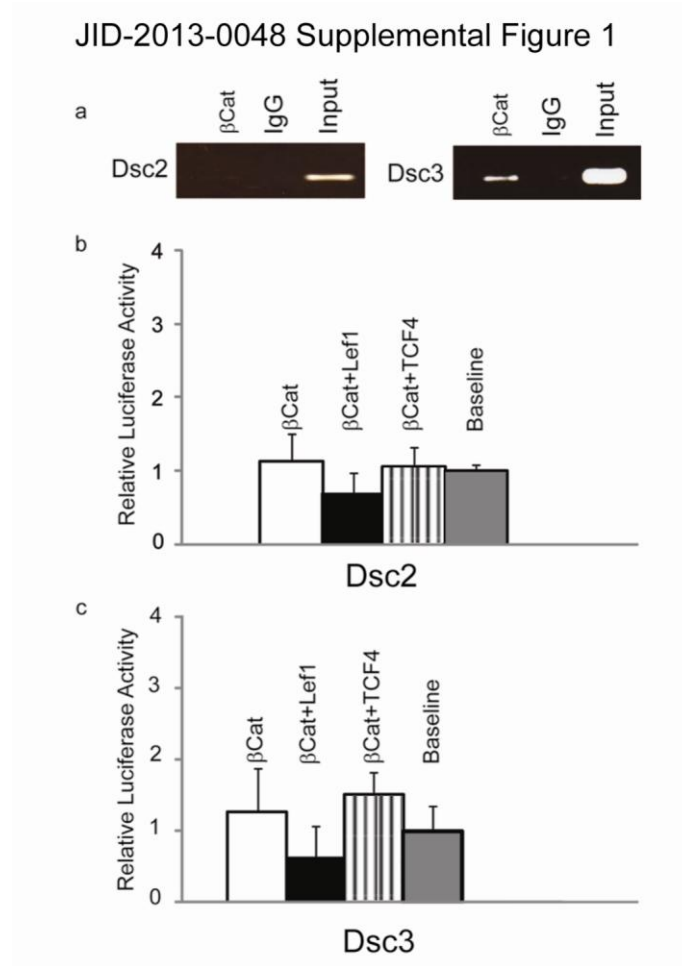

**Supplemental Figure. Effects of  $\beta$ -catenin on *Dsc* reporter activities.** (a-b) ChIP assays demonstrating binding of  $\beta$ -catenin to the *Dsc3* but not the *Dsc2* promoter. Input, chromatin used for immunoprecipitation; IgG, IP with unspecific IgG. (b-c) Reporter assays in mouse keratinocytes.  $\beta$ -catenin ( $\beta$ Cat), TCF4 and Lef-1 are tested for their ability to affect *Dsc* promoter activities. Baseline reporter activity (set to 1) is defined as the activity of the promoter fragments in the absence of ectopically expressed  $\beta$ Cat, TCF4 or Lef-1. No statistically significant effects of any combination of catenin and TCF/Lef factors on either reporter construct were observed. Error bars, standard deviation.

Table 1. Primer sequences

---

|         |                                              |
|---------|----------------------------------------------|
| Dsc1-1F | ATGGTCCTTCCTTCCATCTC                         |
| Dsc1-1R | CTGAAGTGGTCCCAATGGCC                         |
| Dsc2-1F | GCCAGTGGTCTGGATT                             |
| Dsc2-1R | TGCGCAGAGGTGGAGC                             |
| Dsc2-2F | GTGGCGGCCAGAGGGAGTTC <u>AT</u> ACCGGTTGAATTC |
| Dsc2-2R | GGATTCAACCGGT <u>AT</u> GAACTCCCTCTGGCCGCCAC |
| Dsc2-3F | TCGGACAGAGGAAAAGC <u>AT</u> CTGGGGACCCAGGC   |
| Dsc2-3R | GCCTGGGTCCCCAG <u>AT</u> GCTTTTCCTCTGTCCGA   |
| Dsc2-4F | TCCTGCTAGACCGCCATCTG                         |
| Dsc2-4R | CTCGCGCTTGTCTGATGCTC                         |
| Dsc2-5F | CTTCTATGGTGTCTTTG <u>GC</u> AAGAGGTGCAGGAGG  |
| Dsc2-5R | CCTCCTGCACCTCTT <u>GC</u> CAAAGACACCATAGAAG  |
| Dsc2-6F | GGCCGTGGAGACAATAGAAC                         |
| Dsc2-6R | CACTCACTGTGCCTTCTGAC                         |
| Dsc3-1F | GCATAGAGACACACAT                             |
| Dsc3-1R | CGCACAGTGCAGCCTCA                            |
| Dsc3-2F | GTACAATCACAATG <u>GC</u> AAGAAAAAAG          |
| Dsc3-2R | CTTTTTTTTCTT <u>GC</u> CATTGTGATTGTAC        |
| Dsc3-3F | CCGACCAGAGCTGTTGTATT                         |
| Dsc3-3R | TGCATAGTGTGTCAGGCTCATC                       |

---
